# Supplementary material for: Diversity of duckweed (Lemnaceae) associated yeasts and their plant growth promoting characteristics
Source: PubMed Central journal article supplement (PMC10462456; doi:10.3934/microbiol.2023026), 2023-05-16

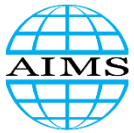

*Research article*

## Diversity of duckweed (*Lemnaceae*) associated yeasts and their plant growth promoting characteristics

Napapohn Kajadpai<sup>1</sup>, Jirameth Angchuan<sup>1</sup>, Pannida Khunnamwong<sup>1,2</sup> and Nantana Srisuk<sup>1,2,\*</sup>

<sup>1</sup> Department of Microbiology, Faculty of Science, Kasetsart University, Bangkok, 10900, Thailand

<sup>2</sup> Biodiversity Center Kasetsart University (BDCKU), Bangkok 10900, Thailand

\* **Correspondence:** Email: fscints@ku.ac.th; Tel: +6625625444; Ext: 6466114; Fax: +6625792081.

### Supplementary

**Table S1.** Duckweed samples and number of isolated yeast strains in this study.

| Date of sampling | Sample code | Province       | GPS coordinates            | Genus of duckweed | Number of yeasts isolated | Yeast strain code   |
|------------------|-------------|----------------|----------------------------|-------------------|---------------------------|---------------------|
| 6/2/2021         | DW1         | Bangkok        | 13°50'39.9"N/100°34'15.6"E | <i>Lemna</i>      | 3                         | DW1-1,2,3           |
| 15/2/2021        | DW2         | Bangkok        | -                          | <i>Spirodela</i>  | 1                         | DW2-1               |
| 15/2/2021        | DWW1        | Bangkok        | -                          | <i>Lemna</i>      | 2                         | DWW1-8,9            |
| 15/2/2021        | DWW2        | Bangkok        | -                          | <i>Wolffia</i>    | 4                         | DWW2-1,2,3,4        |
| 20/2/2021        | DW3         | Samutsongkhram | 13°28'04.6"N/99°53'38.4"E  | <i>Lemna</i>      | 8                         | DW3-1,2,3,4,5,7,8,9 |
| 4/3/2021         | DW4         | Bangkok        | 13°51'31.1"N/100°40'31.4"E | <i>Lemna</i>      | 2                         | DW4-1,2             |
| 11/3/2021        | DW5         | Bangkok        | 13°50'58.0"N/100°34'07.7"E | <i>Lemna</i>      | 0                         | -                   |
| 14/3/2021        | DW6         | Suphanburi     | 14°25'43.0"N/100°00'28.8"E | <i>Spirodela</i>  | 0                         | -                   |
| 14/3/2021        | DW7         | Suphanburi     | 14°25'39.0"N/100°00'50.4"E | <i>Lemna</i>      | 1                         | DW7-1               |
| 14/3/2021        | DW8         | Suphanburi     | 14°25'35.7"N/100°00'53.5"E | <i>Lemna</i>      | 3                         | DW8-2,3,4           |
| 26/3/2021        | DW9         | Bangkok        | 13°52'36.8"N/100°40'55.3"E | <i>Spirodela</i>  | 0                         | -                   |
| 26/3/2021        | DW11        | Pathumthani    | 13°55'52.2"N/100°44'49.5"E | <i>Spirodela</i>  | 0                         | -                   |

*Continued on next page*

| Date of sampling | Sample code | Province            | GPS coordinates            | Genus of duckweed | Number of isolated yeasts | Yeast strain code                    |
|------------------|-------------|---------------------|----------------------------|-------------------|---------------------------|--------------------------------------|
| 26/3/2021        | DW12        | Pathumthani         | 13°55'52.2"N/100°44'49.5"E | <i>Spirodela</i>  | 0                         | -                                    |
| 26/3/2021        | DW13        | Pathumthani         | 13°55'52.2"N/100°44'49.5"E | <i>Wolffia</i>    | 0                         | -                                    |
| 26/3/2021        | DW14        | Pathumthani         | 13°55'51.1"N/100°44'45.4"E | <i>Lemna</i>      | 0                         | -                                    |
| 26/3/2021        | DW15        | Pathumthani         | 13°55'46.6"N/100°43'58.3"E | <i>Lemna</i>      | 2                         | DW15-1,2                             |
| 26/3/2021        | DW16        | Bangkok             | 13°54'01.5"N/100°41'33.9"E | <i>Lemna</i>      | 0                         | -                                    |
| 2/4/2021         | DWW14 S     | -                   | -                          | <i>Spirodela</i>  | 8                         | DWW14<br>S-<br>1,2,3,4,5,6,7,8       |
| 5/4/2021         | DWW14 W     | -                   | -                          | <i>Wolffia</i>    | 4                         | DWW14<br>W-1,2,3,4                   |
| 25/8/2021        | DW18        | Bangkok             | 13°51'03.3"N/100°34'38.1"E | <i>Spirodela</i>  | 2                         | DW18-1,2                             |
| 3/9/2021         | DWW3        | Chumphon            | 10°32'37.3"N/99°11'53.1"E  | <i>Spirodela</i>  | 8                         | DWW3-<br>1,2,3,4,5,6,7,8             |
| 3/9/2021         | DWW4        | Chumphon            | 10°32'37.3"N/99°11'53.1"E  | <i>Lemna</i>      | 8                         | DWW4-<br>1,2,3,4,6,7,8,9             |
| 3/9/2021         | DW20        | Bangkok             | 13°50'53.2"N/100°33'59.8"E | <i>Spirodela</i>  | 0                         | -                                    |
| 19/9/2021        | DWEN21      | Bangkok             | 13°77'53.8"N/100°75'88.6"E | <i>Lemna</i>      | 2                         | DWEN21-1,2                           |
| 19/9/2021        | DWEN22      | Bangkok             | 13°77'54.3"N/100°75'95.6"E | <i>Lemna</i>      | 8                         | DWEN22-<br>1,2,3,4,5,6,7,8           |
| 19/9/2021        | DWEN23      | Bangkok             | 13°78'02.6"N/100°76'11.8"E | <i>Lemna</i>      | 9                         | DWEN23-<br>1,2,3,4,5,6,7,8,<br>9     |
| 19/9/2021        | DWEN24      | Bangkok             | 13°78'03.6"N/100°76'11.4"E | <i>Lemna</i>      | 0                         | -                                    |
| 4/10/2021        | DWW5        | Prachuap Khiri Khan | 12°07'31.3"N/99°54'20.4"E  | <i>Lemna</i>      | 11                        | DWW5-<br>1,2,3,4,5,6,7,8,<br>9,11,12 |
| 4/10/2021        | DWW6        | Prachuap Khiri Khan | 12°07'31.3"N/99°54'20.4"E  | <i>Spirodela</i>  | 1                         | DWW6-1                               |
| 4/10/2021        | DWW11       | Prachuap Khiri Khan | 12°07'31.3"N/99°54'20.4"E  | <i>Wolffia</i>    | 2                         | DWW11-1,2                            |
| 18/10/2021       | DWEN25      | Bangkok             | 13°46'33.5"N/100°46'06.6"E | <i>Lemna</i>      | 0                         | -                                    |
| 18/10/2021       | DWEN26      | Bangkok             | 13°46'33.0"N/100°46'07.8"E | <i>Lemna</i>      | 7                         | DWEN26-<br>3,4,5,6,7,9,10            |
| 18/10/2021       | DWEN27      | Bangkok             | 13°46'43.9"N/100°46'41.1"E | <i>Lemna</i>      | 2                         | DWEN27-1,2                           |
| 3/11/2021        | DWW7        | Prachuap Khiri Khan | 12°14'00.9"N/99°55'40.2"E  | <i>Landotia</i>   | 1                         | DWW7-1                               |
| 4/11/2021        | DWW8        | Prachuap Khiri Khan | 12°14'37.1"N/99°55'57.0"E  | <i>Lemna</i>      | 1                         | DWW8-1                               |
| 5/11/2021        | DWW9        | Prachuap Khiri Khan | 12°23'03.0"N/99°59'01.9"E  | <i>Lemna</i>      | 1                         | DWW9-1                               |

*Continued on next page*

| Date of sampling | Sample code | Province            | GPS coordinates            | Genus of duckweed | Number of isolated yeasts | Yeast strain code                             |
|------------------|-------------|---------------------|----------------------------|-------------------|---------------------------|-----------------------------------------------|
| 6/11/2021        | DWW10       | Prachuap Khiri Khan | 12°56'52.7"N/99°55'55.3"E  | <i>Lemna</i>      | 3                         | DWW10-2,3,4                                   |
| 12/11/2021       | DWEN28      | Bangkok             | 13°51'13.0"N/100°40'26.9"E | <i>Lemna</i>      | 2                         | DWEN28-1,2                                    |
| 12/11/2021       | DWEN29      | Bangkok             | 13°52'07.9"N/100°41'28.2"E | <i>Lemna</i>      | 12                        | DWEN29-1,2,3,4,5,6,7,8,9,10,11,12             |
| 12/11/2021       | DWEN30      | Bangkok             | 13°51'36.1"N/100°40'32.6"E | <i>Lemna</i>      | 16                        | DWEN30-1,2,3,4,5,6,7,8,9,10,11,12,13,14,15,16 |
| 15/11/2021       | DWEN31      | Pathumthani         | 13°57'03.1"N/100°49'07.0"E | <i>Lemna</i>      | 3                         | DWEN31-1,2,3                                  |
| 15/11/2021       | DWEN32      | Pathumthani         | 13°56'59.2"N/100°48'48.6"E | <i>Spirodela</i>  | 3                         | DWEN32-1,2,3                                  |
| 15/11/2021       | DWEN33      | Nakornnayok         | 14°06'53.6"N/100°59'09.3"E | <i>Lemna</i>      | 6                         | DWEN33-1,2,3,5,6,8                            |
| 15/11/2021       | DWEN34      | Prajnaburi          | 13°58'29.4"N/101°08'56.9"E | <i>Lemna</i>      | 6                         | DWEN34-2,3,4,5,6,7                            |
| 15/11/2021       | DWEN35      | Sa Kaew             | 13°26'25.8"N/102°08'00.6"E | <i>Spirodela</i>  | 4                         | DWEN35-1,2,3,4                                |
| 16/11/2021       | DWEN36      | Trad                | 12°11'10.3"N/102°29'10.2"E | <i>Lemna</i>      | 8                         | DWEN36-1,2,3,4,5,6,7,8                        |
| 16/11/2021       | DWEN37      | Rayong              | 12°47'54.8"N/101°39'52.8"E | <i>Lemna</i>      | 10                        | DWEN37-1,2,4,5,6,7,8,9,10,11                  |
| 17/11/2021       | DWEN38      | Chonburi            | 13°13'22.4"N/100°58'02.7"E | <i>Landotia</i>   | 8                         | DWEN38-1,2,4,5,6,7,8,9                        |
| 17/11/2021       | DWEN39      | Chachoengsao        | 13°33'49.2"N/100°59'49.6"E | <i>Lemna</i>      | 6                         | DWEN39-1,2,3,4,5,6                            |
| 17/11/2021       | DWEN40      | Chachoengsao        | 13°35'12.5"N/101°04'04.1"E | <i>Lemna</i>      | 0                         | -                                             |
| 9/4/2022         | DWEN41      | Bangkok             | 13°51'51.8"N/100°45'32.6"E | <i>Landotia</i>   | 4                         | DWEN41-1,2,3,4                                |
| 15/4/2022        | DWEN42      | Bangkok             | 13°47'19.8"N/100°49'36.2"E | <i>Landotia</i>   | 1                         | DWEN42-1                                      |
| 15/4/2022        | DWEN43      | Bangkok             | 13°46'57.5"N/100°49'46.9"E | <i>Landotia</i>   | 2                         | DWEN43-1,2                                    |
| 15/4/2022        | DWEN44      | Bangkok             | 13°46'57.2"N/100°49'47.0"E | <i>Landotia</i>   | 0                         | -                                             |
| 15/4/2022        | DWEN45      | Bangkok             | 13°45'33.7"N/100°50'19.5"E | <i>Landotia</i>   | 1                         | DWEN45-1                                      |
| 15/4/2022        | DWEN46      | Bangkok             | 13°45'27.1"N/100°50'19.9"E | <i>Spirodela</i>  | 0                         | -                                             |
| 15/4/2022        | DWEN47      | Bangkok             | 13°45'30.0"N/100°50'19.8"E | <i>Landotia</i>   | 1                         | DWEN47-1                                      |
| 15/4/2022        | DWEN48      | Bangkok             | 13°45'15.6"N/100°50'21.6"E | <i>Lemna</i>      | 0                         | -                                             |
| 15/4/2022        | DWEN49      | Bangkok             | 13°45'25.6"N/100°50'19.9"E | <i>Lemna</i>      | 2                         | DWEN49-1,2                                    |
| 24/4/2022        | DWEN50      | Kanchanaburi        | 14°03'45.5"N/99°52'77.6"E  | <i>Lemna</i>      | 1                         | DWEN50-1                                      |
| 24/4/2022        | DWEN51      | Kanchanaburi        | 14°03'44.9"N/99°52'78.1"E  | <i>Lemna</i>      | 0                         | -                                             |

*Continued on next page*

| Date of sampling | Sample code | Province      | GPS coordinates            | Genus of duckweed | Number of isolated yeasts | Yeast strain code                            |
|------------------|-------------|---------------|----------------------------|-------------------|---------------------------|----------------------------------------------|
| 24/4/2022        | DWEN52      | Kanchanaburi  | 14°03'40.4"N/99°52'81.4"E  | <i>Lemna</i>      | 0                         | -                                            |
| 3/5/2022         | DWEN53      | Nonthaburi    | 13°99'59.6"N/100°30'11.2"E | <i>Landotia</i>   | 5                         | DWEN53-<br>1,2,3,4,5                         |
| 3/5/2022         | DWEN54      | Nonthaburi    | 14°00'00.3"N/100°27'43.1"E | <i>Lemna</i>      | 3                         | DWEN54-2,3,6                                 |
| 3/5/2022         | DWEN55      | Nakhon Pathom | 14°01'08.5"N/100°25'98.3"E | <i>Lemna</i>      | 5                         | DWEN55-<br>1,2,3,4,6                         |
| 3/5/2022         | DWEN56      | Nakhon Pathom | 14°00'78.9"N/100°24'32.6"E | <i>Lemna</i>      | 9                         | DWEN56-<br>1,2,3,5,6,7,9,10<br>,11           |
| 3/5/2022         | DWEN57      | Nakhon Pathom | 14°01'53.9"N/100°19'28.9"E | <i>Landotia</i>   | 0                         | -                                            |
| 3/5/2022         | DWEN58      | Nakhon Pathom | 14°01'36.0"N/100°15'75.2"E | <i>Lemna</i>      | 0                         | -                                            |
| 3/5/2022         | DWEN59      | Nakhon Pathom | 14°01'35.2"N/100°15'75.7"E | <i>Lemna</i>      | 8                         | DWEN59-<br>1,2,3,4,5,6,7,8                   |
| 3/5/2022         | DWEN60      | Nakhon Pathom | 14°01'33.8"N/100°15'69.4"E | <i>Spirodela</i>  | 5                         | DWEN60-<br>1,2,3,4,5                         |
| 3/5/2022         | DWEN61      | Nakhon Pathom | 14°01'25.2"N/100°15'73.1"E | <i>Spirodela</i>  | 4                         | DWEN61-<br>1,2,3,5                           |
| 3/5/2022         | DWEN62      | Nakhon Pathom | 14°00'91.6"N/100°23'68.9"E | <i>Lemna</i>      | 13                        | DWEN62-<br>1,2,3,4,5,6,7,8,<br>9,10,11,12,13 |

-; Data not available

**Table S2.** Number of strains, relative frequency and frequency of occurrence of yeasts isolated from duckweed samples.

| Yeast taxa                                                                                                           | No. of yeast strains from duckweed genera |              |                   |                | RF (%) | FO (%) |      |
|----------------------------------------------------------------------------------------------------------------------|-------------------------------------------|--------------|-------------------|----------------|--------|--------|------|
|                                                                                                                      | <i>Landotia</i>                           | <i>Lemna</i> | <i>Spirodella</i> | <i>Wolffia</i> |        |        |      |
| Phylum Ascomycota                                                                                                    |                                           |              |                   |                | 139    |        |      |
| Subphylum Saccharomycotina                                                                                           |                                           |              |                   |                |        |        |      |
| Debaryomycetaceae                                                                                                    |                                           |              |                   |                |        |        |      |
| <i>Candida albicans</i> ( <i>Candida/Lodderomyces</i> clade)                                                         | nd                                        | 1            | nd                | nd             | 1      | 0.4    | 1.4  |
| <i>Candida jaroonii</i> ( <i>Yamadazyma</i> clade)                                                                   | nd                                        | 1            | nd                | nd             | 1      | 0.4    | 1.4  |
| <i>Candida metapsilosis</i> ( <i>Candida/Lodderomyces</i> clade)                                                     | nd                                        | 1            | nd                | nd             | 1      | 0.4    | 1.4  |
| <i>Candida orthopsilosis</i> ( <i>Candida/Lodderomyces</i> clade)                                                    | nd                                        | nd           | nd                | 4              | 4      | 1.6    | 1.4  |
| <i>Candida palmioleophila</i> ( <i>Candida glaebose</i> clade)                                                       | nd                                        | 5            | nd                | nd             | 5      | 2      | 2.8  |
| <i>Candida parapsilosis</i> ( <i>Candida/Lodderomyces</i> clade)                                                     | nd                                        | 9            | nd                | nd             | 9      | 3.6    | 5.6  |
| <i>Candida tropicalis</i> ( <i>Candida/Lodderomyces</i> clade)                                                       | 1                                         | 16           | 1                 | nd             | 19     | 7.5    | 15.3 |
| <i>Candida</i> sp. group 1<br>(closely related to <i>C. tropicalis</i> in <i>Candida/Lodderomyces</i> clade)         | nd                                        | 1            | nd                | nd             | 1      | 0.4    | 1.4  |
| <i>Debaryomyces singareniensis</i>                                                                                   | 1                                         | nd           | 1                 | nd             | 1      | 0.4    | 1.4  |
| <i>Lodderomyces elongisporus</i>                                                                                     | nd                                        | 1            | nd                | nd             | 1      | 0.4    | 1.4  |
| <i>Meyerozyma caribbica</i>                                                                                          | 2                                         | 7            | 2                 | nd             | 11     | 4.4    | 9.7  |
| <i>Meyerozyma carpophila</i>                                                                                         | nd                                        | 4            | 1                 | nd             | 5      | 2      | 5.6  |
| <b>Metschnikowiaceae</b>                                                                                             |                                           |              |                   |                |        |        |      |
| <i>Candida pseudointermedia</i> ( <i>Candida/Metschnikowiaceae</i> clade)                                            | nd                                        | 3            | nd                | nd             | 3      | 1.2    | 4.2  |
| <i>Candida</i> sp. group 2<br>(closely related to <i>C. suratensis</i><br>in <i>Candida/Metschnikowiaceae</i> clade) | nd                                        | 2            | nd                | nd             | 2      | 0.8    | 1.4  |
| <i>Kodamaea ohmeri</i>                                                                                               | 2                                         | 3            | 2                 | nd             | 5      | 2      | 4.2  |
| <i>Metschnikowia koreensis</i>                                                                                       | nd                                        | 1            | nd                | nd             | 1      | 0.4    | 1.4  |
| <i>Metschnikowia saccharicola</i>                                                                                    | nd                                        | nd           | 2                 | nd             | 2      | 0.8    | 1.4  |

| Yeast taxa                                                                                                              | No. of yeast strains from duckweed genera |              |                   |                | RF (%) | FO (%) |      |
|-------------------------------------------------------------------------------------------------------------------------|-------------------------------------------|--------------|-------------------|----------------|--------|--------|------|
|                                                                                                                         | <i>Landotia</i>                           | <i>Lemna</i> | <i>Spirodella</i> | <i>Wolffia</i> |        |        |      |
| <b>Phaffomycetaceae</b>                                                                                                 |                                           |              |                   |                |        |        |      |
| <i>Candida</i> sp. group3<br>(closely related to <i>Candida yuanshanica</i><br>in <i>Candida/Wickerhamomyces</i> clade) | nd                                        | nd           | 1                 | nd             | 1      | 0.4    | 1.4  |
| <i>Cyberlindnera fabianii</i>                                                                                           | nd                                        | 2            | nd                | nd             | 2      | 0.8    | 1.4  |
| <i>Cyberlindnera jadinii</i>                                                                                            | nd                                        | nd           | 1                 | nd             | 1      | 0.4    | 1.4  |
| <i>Cyberlindnera subsufficiens</i>                                                                                      | nd                                        | nd           | 2                 | nd             | 2      | 0.8    | 1.4  |
| <i>Starmera stellimalicola</i>                                                                                          | nd                                        | 1            | nd                | nd             | 1      | 0.4    | 1.4  |
| <b>Pichiaceae</b>                                                                                                       |                                           |              |                   |                |        |        |      |
| <i>Candida ethanolica</i> ( <i>Candida/Pichia</i> clade)                                                                | nd                                        | 3            | nd                | nd             | 3      | 1.2    | 1.4  |
| <i>Candida pseudolambica</i> ( <i>Candida/Pichia</i> clade)                                                             | nd                                        | 5            | 2                 | nd             | 7      | 2.8    | 8.3  |
| <i>Candida</i> sp. group 4<br>(closely related to <i>Candida pseudolambica</i><br>in <i>Candida/Pichia</i> clade)       | nd                                        | 1            | nd                | nd             | 1      | 0.4    | 1.4  |
| <i>Ogataea thermomethanolica</i>                                                                                        | nd                                        | 1            | nd                | nd             | 1      | 0.4    | 1.4  |
| <i>Pichia kluyveri</i>                                                                                                  | nd                                        | nd           | 1                 | nd             | 1      | 0.4    | 1.4  |
| <i>Pichia kudriavzevii</i>                                                                                              | nd                                        | 12           | 2                 | 1              | 15     | 6      | 12.5 |
| <i>Pichia manshurica</i>                                                                                                | nd                                        | nd           | 1                 | nd             | 1      | 0.4    | 1.4  |
| <i>Pichia occidentalis</i>                                                                                              | nd                                        | nd           | 1                 | nd             | 1      | 0.4    | 1.4  |
| <b>Saccharomycetaceae</b>                                                                                               |                                           |              |                   |                |        |        |      |
| <i>Kluyveromyces marxianus</i>                                                                                          | nd                                        | 2            | nd                | nd             | 2      | 0.8    | 1.4  |
| <i>Kluyveromyces starmeri</i>                                                                                           | nd                                        | 2            | 1                 | nd             | 3      | 1.2    | 2.8  |
| <b>Saccharomycetales incertae sedis</b>                                                                                 |                                           |              |                   |                |        |        |      |
| <i>Candida nonsorbophila</i> ( <i>Candida/Saccharomycetales</i> clade)                                                  | nd                                        | 1            | nd                | nd             | 1      | 0.4    | 1.4  |
| <i>Crinitomyces flavificans</i>                                                                                         | 1                                         | 8            | 2                 | 1              | 12     | 4.8    | 16.7 |
| <i>Diutina rugosa</i>                                                                                                   | 1                                         | 1            | nd                | nd             | 2      | 0.8    | 2.8  |

| Yeast taxa                                                                  | No. of yeast strains from duckweed genera |              |                   |                | RF (%)     | FO (%) |     |
|-----------------------------------------------------------------------------|-------------------------------------------|--------------|-------------------|----------------|------------|--------|-----|
|                                                                             | <i>Landotia</i>                           | <i>Lemna</i> | <i>Spirodella</i> | <i>Wolffia</i> |            |        |     |
| <i>Sporopachydermia lactativora</i>                                         | nd                                        | 1            | nd                | nd             | 1          | 0.4    | 1.4 |
| <i>Starmerella</i> sp. (closely related to <i>Starmerella caucasica</i> )   | nd                                        | 1            | 2                 | nd             | 3          | 1.2    | 2.8 |
| <b>Saccharomycodaceae</b>                                                   |                                           |              |                   |                |            |        |     |
| <i>Hanseniaspora opuntiae</i>                                               | nd                                        | 1            | nd                | nd             | 1          | 0.4    | 1.4 |
| <b>Trichomonascaceae</b>                                                    |                                           |              |                   |                |            |        |     |
| <i>Wickerhamiella infanticola</i>                                           | nd                                        | 3            | nd                | nd             | 3          | 1.2    | 4.2 |
| <i>Wickerhamiella martinezcruzae</i>                                        | nd                                        | 1            | nd                | nd             | 1          | 0.4    | 1.4 |
| <i>Zygoascus</i> sp. (closely related to <i>Zygoascus polysorbophila</i> )  | nd                                        | 1            | nd                | nd             | 1          | 0.4    | 1.4 |
| <b>Phylum Basidiomycota</b>                                                 |                                           |              |                   |                | <b>113</b> |        |     |
| <b>Subphylum Agaricomycotina</b>                                            |                                           |              |                   |                |            |        |     |
| <b>Filobasidiaceae</b>                                                      |                                           |              |                   |                |            |        |     |
| <i>Naganishia liquefaciens</i>                                              | 1                                         | nd           | nd                | nd             | 1          | 0.4    | 1.4 |
| <b>Cryptococcaceae</b>                                                      |                                           |              |                   |                |            |        |     |
| <i>Kwoniella heveanensis</i>                                                | nd                                        | 1            | nd                | nd             | 1          | 0.4    | 1.4 |
| <b>Rhynchogastremaceae</b>                                                  |                                           |              |                   |                |            |        |     |
| <i>Papiliotrema aspenensis</i>                                              | nd                                        | 1            | nd                | nd             | 1          | 0.4    | 1.4 |
| <i>Papiliotrema laurentii</i>                                               | 5                                         | 41           | 7                 | 2              | 55         | 21.8   | 25  |
| <i>Papiliotrema rajasthanensis</i>                                          | nd                                        | 1            | nd                | nd             | 1          | 0.4    | 1.4 |
| <i>Papiliotrema ruineniae</i>                                               | 1                                         | nd           | nd                | nd             | 1          | 0.4    | 1.4 |
| <i>Papiliotrema</i> sp. (closely related to <i>Papiliotrema laurentii</i> ) | nd                                        | 2            | 3                 | nd             | 5          | 2      | 6.9 |
| <b>Trichosporonaceae</b>                                                    |                                           |              |                   |                |            |        |     |
| <i>Apiotrichum loubieri</i>                                                 | nd                                        | 1            | nd                | nd             | 1          | 0.4    | 1.4 |
| <b>Subphylum Pucciniomycotina</b>                                           |                                           |              |                   |                |            |        |     |
| <b>Sporidiobolaceae</b>                                                     |                                           |              |                   |                |            |        |     |
| <i>Rhodosporidiobolus fluvialis</i>                                         | nd                                        | nd           | 2                 | 2              | 4          | 1.6    | 2.8 |
| <i>Rhodosporidiobolus ruineniae</i>                                         | nd                                        | 6            | nd                | nd             | 6          | 2.4    | 1.4 |

| Yeast taxa                                                                 | No. of yeast strains from duckweed genera |              |                   |                | RF (%) | FO (%) |      |
|----------------------------------------------------------------------------|-------------------------------------------|--------------|-------------------|----------------|--------|--------|------|
|                                                                            | <i>Landotia</i>                           | <i>Lemna</i> | <i>Spirodella</i> | <i>Wolffia</i> |        |        |      |
| <i>Rhodotorula mucilaginosa</i>                                            | 4                                         | 12           | nd                | nd             | 16     | 6.3    | 13.9 |
| <i>Rhodotorula paludigena</i>                                              | nd                                        | 1            | nd                | nd             | 1      | 0.4    | 1.4  |
| <i>Rhodotorula taiwanensis</i>                                             | 1                                         | 9            | 1                 | nd             | 11     | 4.4    | 8.3  |
| <i>Rhodotorula diobovata</i>                                               | nd                                        | 2            | nd                | nd             | 2      | 0.8    | 1.4  |
| <i>Rhodotorula</i> sp. (closely related to <i>Rhodotorula toruloides</i> ) | nd                                        | 1            | nd                | nd             | 1      | 0.4    | 1.4  |
| <b>Subphylum Ustilaginomycotina</b>                                        |                                           |              |                   |                |        |        |      |
| <b>Ustilaginaceae</b>                                                      |                                           |              |                   |                |        |        |      |
| <i>Moesziomyces antarcticus</i>                                            | nd                                        | 1            | 3                 | nd             | 4      | 1.6    | 4.2  |
| <i>Pseudozyma churashimaensis</i>                                          | nd                                        | 2            | nd                | nd             | 2      | 0.8    | 1.4  |

RF; Relative frequency (%) was calculated as the number of isolates of a particular species as a proportion of the total number of strains.  
FO; Frequency of occurrence (%) was calculated as number of samples, where a particular species was observed as a proportion of the total number of samples.  
nd; not detected.





| Taxa                                                                                                                      | No. of strain | Strain DMKU-                                                                                                  | D1/D2 GenBank accession no. of closest species | Similarity to closest species (%) | No. of sample |
|---------------------------------------------------------------------------------------------------------------------------|---------------|---------------------------------------------------------------------------------------------------------------|------------------------------------------------|-----------------------------------|---------------|
| <i>Lodderomyces elongisporus</i>                                                                                          | 1             | DWW1-9                                                                                                        | KY108330                                       | 100                               | 1             |
| <i>Meyerozyma caribbica</i>                                                                                               | 11            | DWEN23-1, DWEN23-9, DWEN34-2, DWEN34-4, DWEN34-5, DWEN34-6, DWEN43-1, DWEN53-2, DWEN60-3, DWEN61-2, DWEN62-11 | NG054806                                       | 100                               | 7             |
| <i>Meyerozyma carpophila</i>                                                                                              | 5             | DWW3-4, DWW4-1, DWW4-9, DW3-1 DWEN39-4                                                                        | NG069408                                       | 99.64-100                         | 4             |
| <b>Metschnikowiaceae</b>                                                                                                  |               |                                                                                                               |                                                |                                   |               |
| <i>Candida pseudointermedia</i><br>( <i>Candida/Metschnikowiaceae</i> clade)                                              | 3             | DWEN30-1, DWEN34-7, DWEN62-8                                                                                  | NG055407                                       | 99.8-100                          | 3             |
| <i>Candida</i> sp. group 2<br>(closely related to <i>Candida suratensis</i><br>in <i>Candida/Metschnikowiaceae</i> clade) | 2             | DW3-4, DW3-8                                                                                                  | AB500863                                       | 98.80-99.20                       | 1             |
| <i>Kodamaea ohmeri</i>                                                                                                    | 5             | DWEN23-3, DWEN23-5, DWEN38-6, DWEN38-9, DWEN50-1                                                              | MK394144                                       | 99.79-100                         | 3             |
| <i>Metschnikowia koreensis</i>                                                                                            | 1             | DWEN23-3                                                                                                      | NG058340                                       | 99.6                              | 1             |
| <i>Metschnikowia saccharicola</i>                                                                                         | 2             | DWEN35-1, DWEN35-3                                                                                            | AB697755                                       | 99.57                             | 1             |
| <b>Phaffomycetaceae</b>                                                                                                   |               |                                                                                                               |                                                |                                   |               |
| <i>Candida</i> sp. group 3<br>(closely related to <i>Candida yuanshanica</i><br>in <i>Candida/Wickerhamomyces</i> clade)  | 1             | DWEN35-4                                                                                                      | NG057184                                       | 98.67                             | 1             |
| <i>Cyberlindnera fabianii</i>                                                                                             | 2             | DWEN28-1, DWEN28-2                                                                                            | NG055731                                       | 100                               | 1             |
| <i>Cyberlindnera jadinii</i>                                                                                              | 1             | DWW14 S-2                                                                                                     | NG056278                                       | 99.41                             | 1             |
| <i>Cyberlindnera subsufficiens</i>                                                                                        | 2             | DWW3-2, DWW3-8                                                                                                | NG059002                                       | 99.76-99.82                       | 1             |

*Continued on next page*

| Taxa                                                                                                              | No. of strain | Strain DMKU-                                                                                                                                        | D1/D2 GenBank accession no. of closest species | Similarity to closest species (%) | No. of sample |
|-------------------------------------------------------------------------------------------------------------------|---------------|-----------------------------------------------------------------------------------------------------------------------------------------------------|------------------------------------------------|-----------------------------------|---------------|
| <i>Starmera stellimalicola</i>                                                                                    | 1             | DWEN23-2                                                                                                                                            | NG060829                                       | 100                               | 1             |
| <b>Pichiaceae</b>                                                                                                 |               |                                                                                                                                                     |                                                |                                   |               |
| <i>Candida ethanolica</i> ( <i>Candida/Pichia</i> clade)                                                          | 3             | DWEN62-10, DWEN62-12, DWEN62-13                                                                                                                     | NG055105                                       | 100                               | 1             |
| <i>Candida pseudolambica</i> ( <i>Candida/Pichia</i> clade)                                                       | 7             | DWW3-1, DWW10-2, DWW10-4, DWEN26-3, DWEN35-2, DWEN39-3, DWEN49-2                                                                                    | NG060822                                       | 99.45-99.81                       | 6             |
| <i>Candida</i> sp. group 4<br>(closely related to <i>Candida pseudolambica</i><br>in <i>Candida/Pichia</i> clade) | 1             | DWEN34-3                                                                                                                                            | NG060822                                       | 99.06                             | 1             |
| <i>Ogataea thermomethanolica</i>                                                                                  | 1             | DWW4-8                                                                                                                                              | AB200285                                       | 99.42                             | 1             |
| <i>Pichia kluyveri</i>                                                                                            | 1             | DWEN38-8                                                                                                                                            | NG055122                                       | 99.82                             | 1             |
| <i>Pichia kudriavzevii</i>                                                                                        | 15            | DWW10-3, DWW11-1, DWEN26-7, DWEN54-3, DWEN56-7, DWEN56-11, DWEN59-4, DWEN59-5, DWEN59-6, DWEN59-8, DWEN60-1, DWEN61-1, DWEN62-2, DWEN62-5, DWEN62-7 | NG055104                                       | 100                               | 9             |
| <i>Pichia manshurica</i>                                                                                          | 1             | DWEN59-7                                                                                                                                            | KY108860                                       | 99.82                             | 1             |
| <i>Pichia occidentalis</i>                                                                                        | 1             | DW1-1                                                                                                                                               | NG055110                                       | 100                               | 1             |
| <b>Saccharomycetaceae</b>                                                                                         |               |                                                                                                                                                     |                                                |                                   |               |
| <i>Kluyveromyces marxianus</i>                                                                                    | 2             | DWW5-1, DWW5-11                                                                                                                                     | JQ689023                                       | 100                               | 1             |
| <i>Kluyveromyces starmeri</i>                                                                                     | 3             | DW2-1, DWEN26-4, DWEN26-5                                                                                                                           | KT853036                                       | 100                               | 2             |
| <b>Saccharomycetales incertae sedis</b>                                                                           |               |                                                                                                                                                     |                                                |                                   |               |
| <i>Candida nonsorbophila</i><br>( <i>Candida/Saccharomycetales</i> clade)                                         | 1             | DWEN26-9                                                                                                                                            | NG055173                                       | 100                               | 1             |

Continued on next page

| Taxa                                                                          | No. of strain | Strain DMKU-                                                                                    | D1/D2 GenBank accession no. of closest species | Similarity to closest species (%) | No. of sample |
|-------------------------------------------------------------------------------|---------------|-------------------------------------------------------------------------------------------------|------------------------------------------------|-----------------------------------|---------------|
| <i>Crinitomyces flavificans</i>                                               | 12            | DWW3-3, DWW3-6, DWW4-7, DWW5-3, DWW5-6, DWW5-8, DWW5-9, DWW5-12, DWW7-1, DWW8-1, DWW11-2, DW1-3 | MH873011                                       | 99.80-100                         | 7             |
| <i>Diutina rugosa</i>                                                         | 2             | DWEN26-6, DWEN53-3                                                                              | GU246244                                       | 99.77-88.78                       | 2             |
| <i>Sporopachydermia lactativora</i>                                           | 1             | DWW5-7                                                                                          | NG042647                                       | 100                               | 1             |
| <i>Starmerella</i> sp.<br>(closely related to <i>Starmerella caucasica</i> )  | 3             | DWEN31-1, DWEN32-2, DWEN32-3                                                                    | NG058407                                       | 97.26-97.42                       | 2             |
| <b>Saccharomycodaceae</b>                                                     |               |                                                                                                 |                                                |                                   |               |
| <i>Hanseniaspora opuntiae</i>                                                 | 1             | DWEN27-1                                                                                        | NG055312                                       | 100                               | 1             |
| <b>Trichomonascaceae</b>                                                      |               |                                                                                                 |                                                |                                   |               |
| <i>Wickerhamiella infanticola</i>                                             | 3             | DW1-2, DW3-3, DWEN30-12                                                                         | NG058278                                       | 99.53-100                         | 3             |
| <i>Wickerhamiella martinezcruzae</i>                                          | 1             | DWEN62-4                                                                                        | KM246828                                       | 99.45                             | 1             |
| <i>Zygoascus</i> sp.<br>(closely related to <i>Zygoascus polysorbophila</i> ) | 1             | DW7-1                                                                                           | NG064312                                       | 99.03                             | 1             |
| <b>Phylum Basidiomycota</b>                                                   |               |                                                                                                 |                                                |                                   |               |
| <b>Subphylum Agaricomycotina</b>                                              |               |                                                                                                 |                                                |                                   |               |
| <b>Filobasidiaceae</b>                                                        |               |                                                                                                 |                                                |                                   |               |
| <i>Naganishia liquefaciens</i>                                                | 1             | DWEN47-1                                                                                        | NG057655                                       | 100                               | 1             |
| <b>Cryptococcaceae</b>                                                        |               |                                                                                                 |                                                |                                   |               |
| <i>Kwoniella heveanensis</i>                                                  | 1             | DWEN33-2                                                                                        | NG057655                                       | 100                               | 1             |
| <b>Rhynchogastremaceae</b>                                                    |               |                                                                                                 |                                                |                                   |               |
| <i>Papiliotrema aspenensis</i>                                                | 1             | DWEN36-2                                                                                        | NG060109                                       | 100                               | 1             |

Continued on next page

| Taxa                                                                           | No. of strain | Strain DMKU-                                                                                                                                                                                                                                                                                                                                                                                                                                                                                                                                                                  | D1/D2 GenBank accession no. of closest species | Similarity to closest species (%) | No. of sample |
|--------------------------------------------------------------------------------|---------------|-------------------------------------------------------------------------------------------------------------------------------------------------------------------------------------------------------------------------------------------------------------------------------------------------------------------------------------------------------------------------------------------------------------------------------------------------------------------------------------------------------------------------------------------------------------------------------|------------------------------------------------|-----------------------------------|---------------|
| <i>Papiliotrema laurentii</i>                                                  | 55            | DWW1-8, DWW9-1, DWW14 S-1, DWW14 S-2, DWW14 S-3, DWW14 S-8, DWW14 W-2, DWW14 W-3, DW8-3, DW15-1, DW15-2, DWEN21-1, DWEN21-2, DWEN21-3, DWEN21-4, DWEN22-5, DWEN22-6, DWEN22-7, DWEN22-8, DWEN29-2, DWEN29-4, DWEN29-5, DWEN29-6, DWEN29-7, DWEN29-8, DWEN29-9, DWEN29-10, DWEN29-11, DWEN29-12, DWEN31-1, DWEN31-2, DWEN31-3, DWEN36-1, DWEN36-3, DWEN36-4, DWEN36-5, DWEN36-6, DWEN36-7, DWEN36-8, DWEN37-1, DWEN37-4, DWEN37-7, DWEN37-8, DWEN37-9, DWEN37-10, DWEN38-4, DWEN38-5, DWEN38-7, DWEN41-1, DWEN41-2, DWEN41-4, DWEN54-6, DWEN55-1, DWEN60-2, DWEN60-4, DWEN61-3 | NG056281                                       | 99.60-99.83                       | 18            |
| <i>Papiliotrema rajasthanensis</i>                                             | 1             | DWEN30-11                                                                                                                                                                                                                                                                                                                                                                                                                                                                                                                                                                     | NG058366                                       | 100                               | 1             |
| <i>Papiliotrema ruineniae</i>                                                  | 1             | DWEN53-4                                                                                                                                                                                                                                                                                                                                                                                                                                                                                                                                                                      | LK023764                                       | 100                               | 1             |
| <i>Papiliotrema</i> sp.<br>(closely related to <i>Papiliotrema laurentii</i> ) | 5             | DWW14 S-6, DWEN29-3, DWEN55-2, DWEN60-5, DWEN61-5                                                                                                                                                                                                                                                                                                                                                                                                                                                                                                                             | NG056281                                       | 99.46-99.49                       | 5             |
| <b>Trichosporonaceae</b>                                                       |               |                                                                                                                                                                                                                                                                                                                                                                                                                                                                                                                                                                               |                                                |                                   |               |
| <i>Apiotrichum loubieri</i>                                                    | 1             | DWEN27-2                                                                                                                                                                                                                                                                                                                                                                                                                                                                                                                                                                      | KY106133                                       | 100                               | 1             |
| <b>Subphylum Pucciniomycotina</b>                                              |               |                                                                                                                                                                                                                                                                                                                                                                                                                                                                                                                                                                               |                                                |                                   |               |

*Continued on next page*

| Taxa                                                                          | No. of strain | Strain DMKU-                                                                                                                                       | D1/D2 GenBank accession no. of closest species | Similarity to closest species (%) | No. of sample |
|-------------------------------------------------------------------------------|---------------|----------------------------------------------------------------------------------------------------------------------------------------------------|------------------------------------------------|-----------------------------------|---------------|
| <b>Sporidiobolaceae</b>                                                       |               |                                                                                                                                                    |                                                |                                   |               |
| <i>Rhodosporiobolus fluvialis</i>                                             | 4             | DWW14 S-4, DWW14 S-7, DWW14 W-1, DWW14 W-4                                                                                                         | NG042341                                       | 99.62                             | 2             |
| <i>Rhodosporiobolus ruineniae</i>                                             | 6             | DW8-2, DWEN26-10, DWEN33-1, DWEN33-5, DWEN33-6, DWEN33-8                                                                                           | KY108979                                       | 99.81-100                         | 3             |
| <i>Rhodotorula mucilaginosa</i>                                               | 16            | DW3-5, DW3-7, DW4-1, DW4-2, DWEN22-1, DWEN22-2, DWEN39-6, DWEN42-1, DWEN43-2, DWEN53-1, DWEN53-5, DWEN56-3, DWEN56-6, DWEN56-9, DWEN59-1, DWEN62-3 | KY109056                                       | 99.82-100                         | 10            |
| <i>Rhodotorula paludigena</i>                                                 | 1             | DWW4-6                                                                                                                                             | NG042383                                       | 99.8                              | 1             |
| <i>Rhodotorula taiwanensis</i>                                                | 11            | DWW5-5, DWW14 S-5, DWEN37-2, DWEN37-5, DWEN37-6, DWEN37-11, DWEN41-3, DWEN55-3, DWEN55-4, DWEN55-6, DWEN56-5                                       | KY109163                                       | 99.79-100                         | 6             |
| <i>Rhodotorula diobovata</i>                                                  | 2             | DW3-1, DW3-9                                                                                                                                       | NG042340                                       | 99.81                             | 1             |
| <i>Rhodotorula</i> sp.<br>(closely related to <i>Rhodotorula toruloides</i> ) | 1             | DWEN59-2                                                                                                                                           | KY109167                                       | 99.43                             | 1             |
| <b>Subphylum Ustilaginomycotina</b>                                           |               |                                                                                                                                                    |                                                |                                   |               |
| <b>Ustilaginaceae</b>                                                         |               |                                                                                                                                                    |                                                |                                   |               |
| <i>Moesziomyces antarcticus</i>                                               | 4             | DWW3-5, DWW3-7, DWW4-3, DWW6-1                                                                                                                     | KY108571                                       | 100                               | 3             |
| <i>Pseudozyma churashimaensis</i>                                             | 2             | DWW5-2, DWW5-4                                                                                                                                     | AB548955                                       | 100                               | 1             |

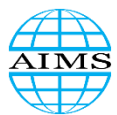

Supplement: microbiol-09-03-026-s001.pdf [file microbiol-09-03-026-s001.pdf]
